# Supplementary material for: Self-assembled nanostructures of optically active phthalocyanine derivatives. Effect of central metal ion on the morphology, dimension, and handedness
Source: Royal Society of Chemistry journal article supplement (doi:10.1039/c2nr31525d), 2012-01-01
Supplement: c2nr31525d.pdf [file c2nr31525d.pdf]

## Supporting Information

**Self-assembled Nanostructures of Optically Active Phthalocyanine Derivatives.  
Effect of Central Metal Ionic on the Morphology, Dimension, and Handedness**

**Ranran Sun,<sup>a</sup> Liang Wang,<sup>b</sup> Jing Tian,<sup>a</sup> Xiaomei Zhang\*<sup>a</sup> and Jianzhuang  
Jiang\*<sup>b</sup>**

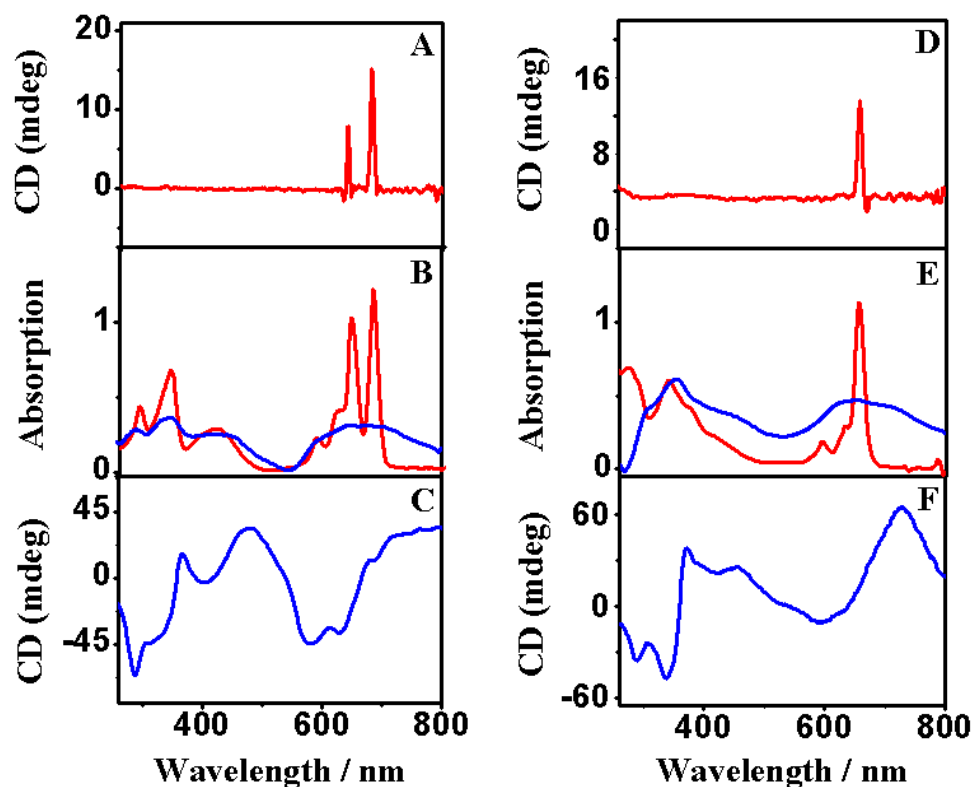

**Figure S1.** Electronic absorption and Circular Dichroism (CD) Spectra. CD spectra of (*S*)-H<sub>2</sub>Pc( $\beta$ -OC<sub>5</sub>H<sub>11</sub>)<sub>8</sub> (**1**) in dilute chloroform solution (A); The electronic absorption spectrum of (*S*)-H<sub>2</sub>Pc( $\beta$ -OC<sub>5</sub>H<sub>11</sub>)<sub>8</sub> (**1**) in dilute chloroform solution (red line) and **1** nanostructures dispersed in methanol (blue line) (B); CD spectra of **1** nanostructures dispersed in methanol (C); CD spectra of (*S*)-ZnPc( $\beta$ -OC<sub>5</sub>H<sub>11</sub>)<sub>8</sub> (**2**) in dilute chloroform solution (D); The electronic absorption spectrum of (*S*)-ZnPc( $\beta$ -OC<sub>5</sub>H<sub>11</sub>)<sub>8</sub> (**2**) in dilute chloroform solution (red line) and **2** nanostructures dispersed in methanol (blue line) (E); CD spectra of **2** nanostructures dispersed in methanol (F).

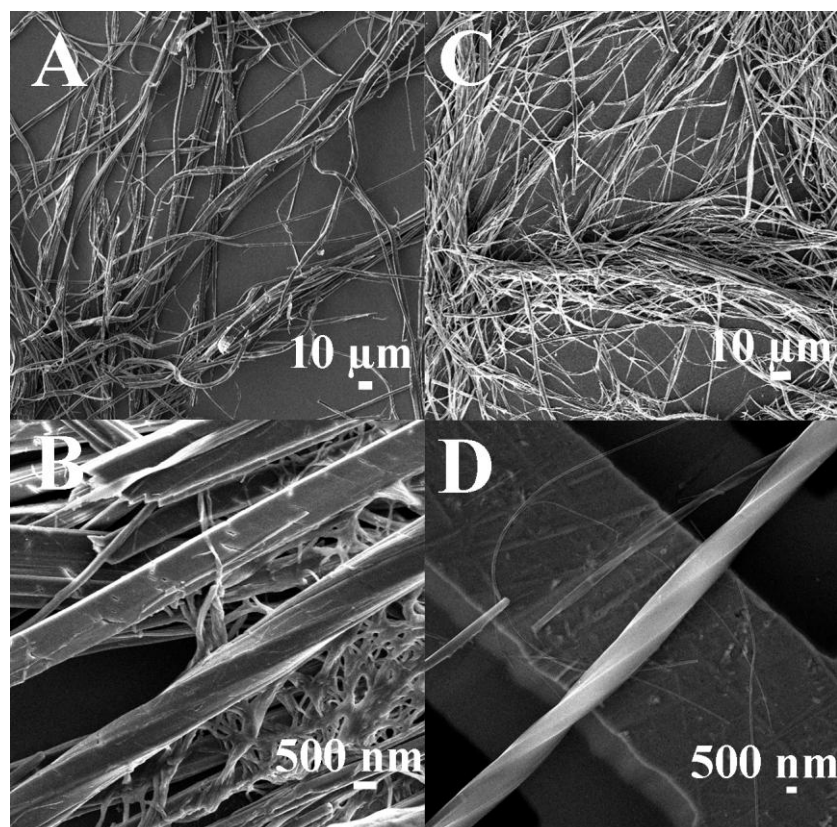

**Figure S2.** SEM images of self-assembled nanostructures fabricated from compounds **1-2**. Nanostructures fabricated from (*S*)-H<sub>2</sub>Pc( $\beta$ -OC<sub>5</sub>H<sub>11</sub>)<sub>8</sub> (**1**) observed by SEM (A); High-magnification SEM image fabricated from **1** showing right-handed fibrous nanostructure (B); Nanostructures fabricated from (*S*)-ZnPc( $\beta$ -OC<sub>5</sub>H<sub>11</sub>)<sub>8</sub> (**2**) observed by SEM (C); High-magnification SEM image fabricated from **2** showing right-handed fibrous nanostructure. (D).

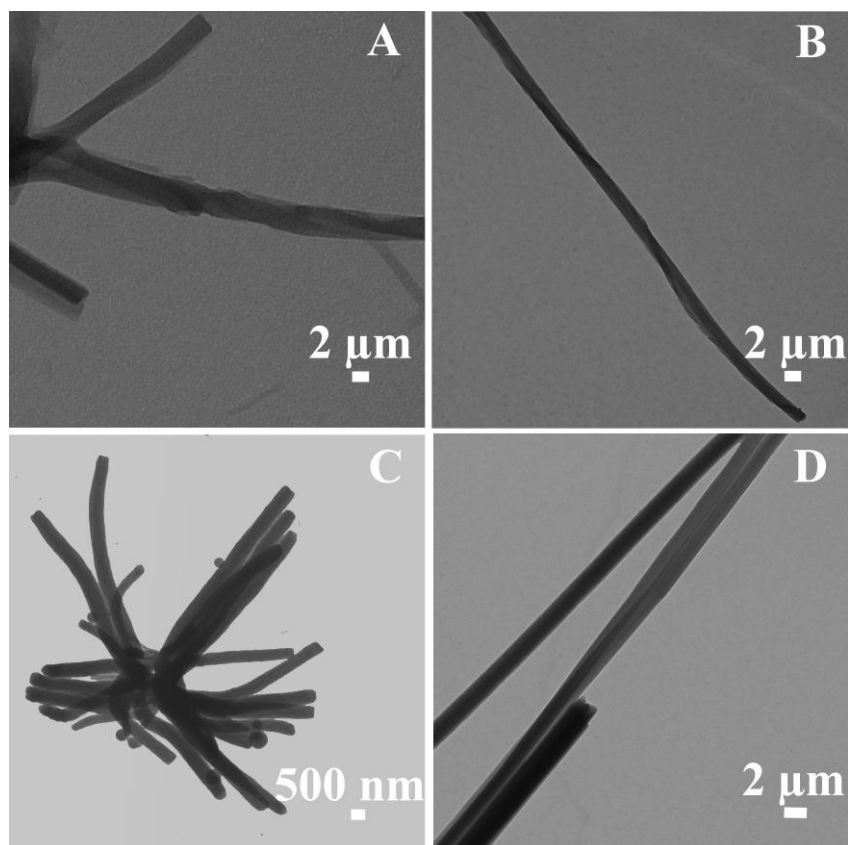

**Figure S3.** TEM images of self-assembled nanostructures fabricated from compounds **1-4**. Nanostructures fabricated from (*S*)-H<sub>2</sub>Pc( $\beta$ -OC<sub>5</sub>H<sub>11</sub>)<sub>8</sub> (**1**) observed by TEM (A); Nanostructures fabricated from (*S*)-ZnPc( $\beta$ -OC<sub>5</sub>H<sub>11</sub>)<sub>8</sub> (**2**) observed by TEM (B); Nanostructures fabricated from (*S*)-CuPc( $\beta$ -OC<sub>5</sub>H<sub>11</sub>)<sub>8</sub> (**3**) observed by TEM (C); Nanostructures fabricated from (*S*)-NiPc( $\beta$ -OC<sub>5</sub>H<sub>11</sub>)<sub>8</sub> (**4**) observed by TEM (D).

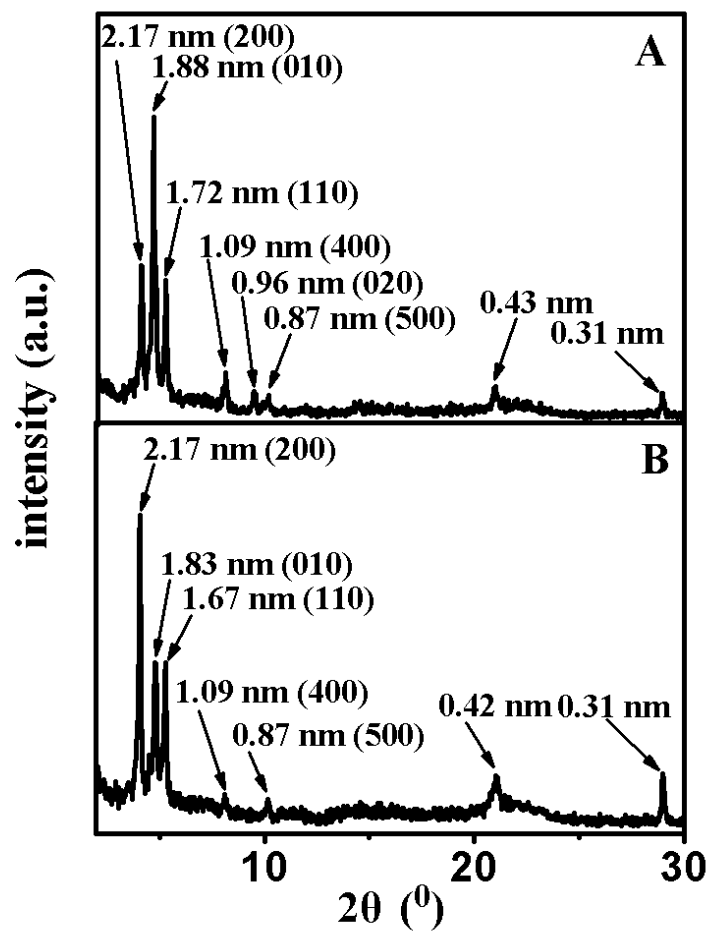

**Figure S4.** XRD profiles of the aggregates fabricated from 1 and 2 (A-B).

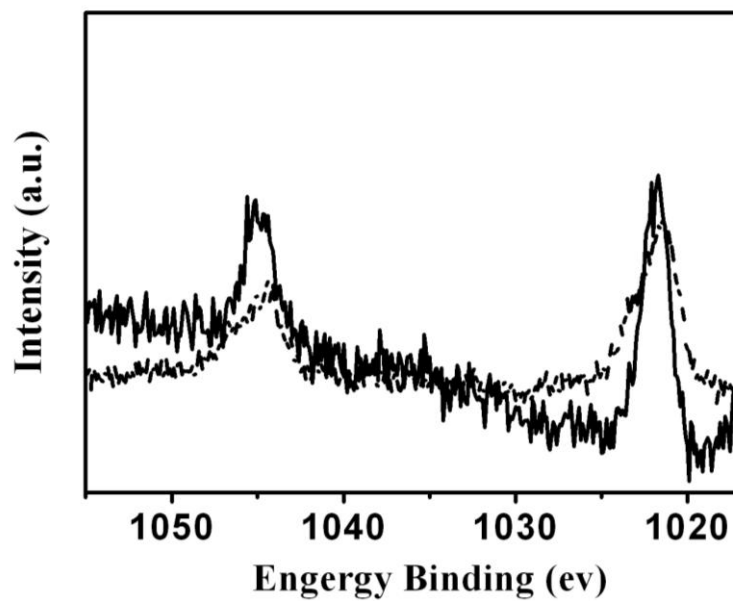

**Figure S5.** X-ray photoelectron spectra for complex **2** (solid line) and aggregates of complex **2** (dotted dash line) deposited on silicon surface.

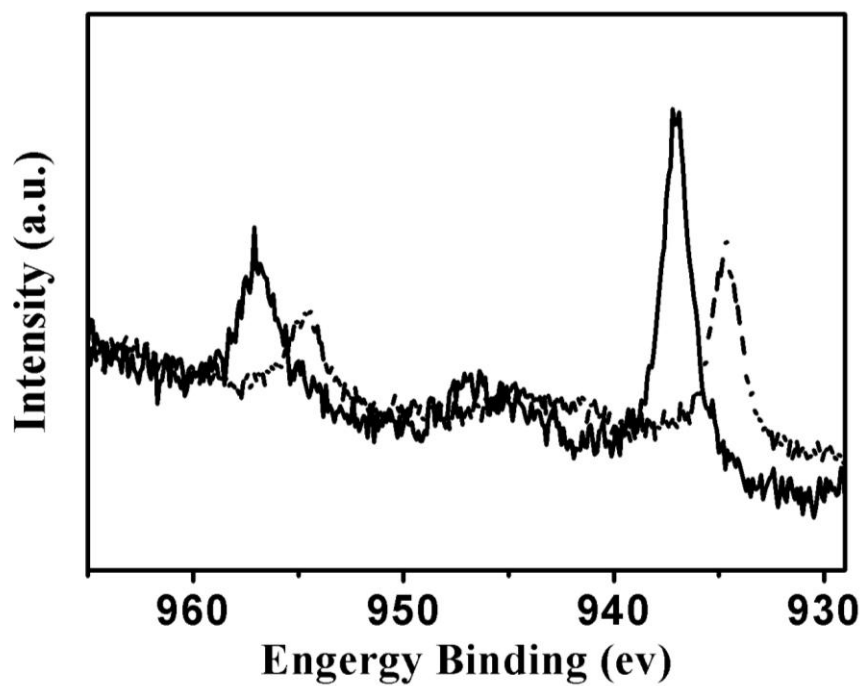

**Figure S6.** X-ray photoelectron spectra for complex **3** (solid line) and aggregates of complex **3** (dotted dash line) deposited on silicon surface.

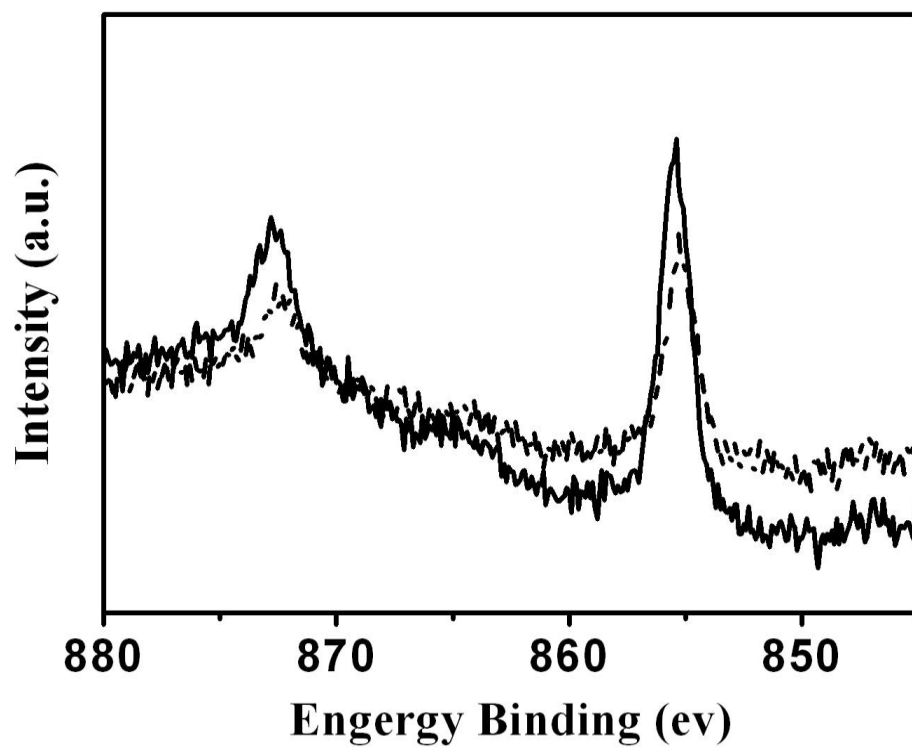

**Figure S7.** X-ray photoelectron spectra for complex **4** (solid line) and aggregates of complex **4** (dotted dash line) deposited on silicon surface.



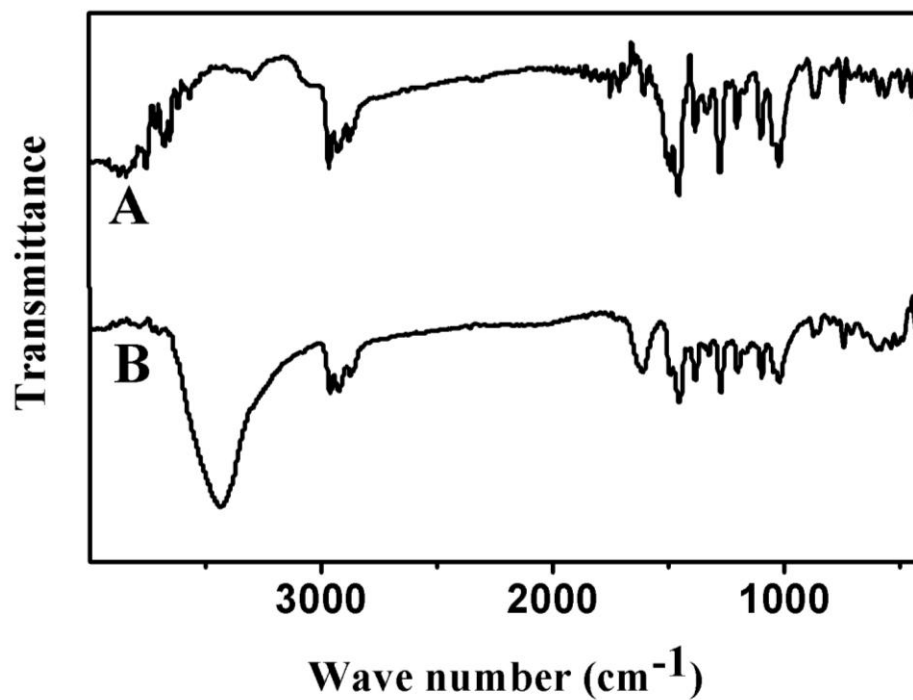

**Figure S8.** IR spectra of phthalocyanine **1** (A) and nanostructures fabricated from **1** (B) in the region of 400-4000 cm<sup>-1</sup> with 2 cm<sup>-1</sup> resolution.

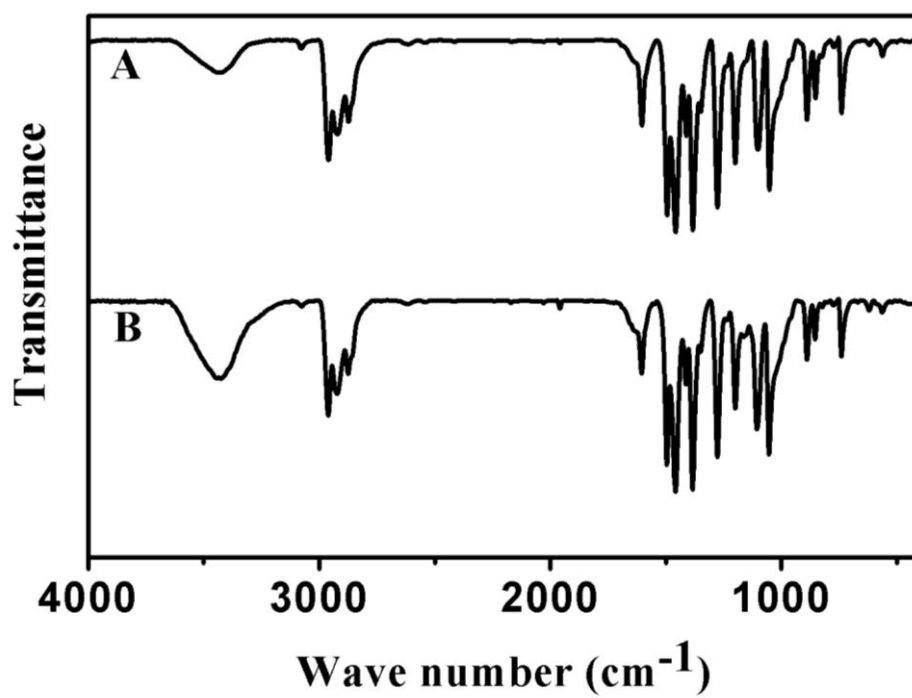

**Figure S9.** IR spectra of phthalocyanine **2** (A) and nanostructures fabricated from **2** (B) in the region of 400-4000 cm<sup>-1</sup> with 2 cm<sup>-1</sup> resolution.

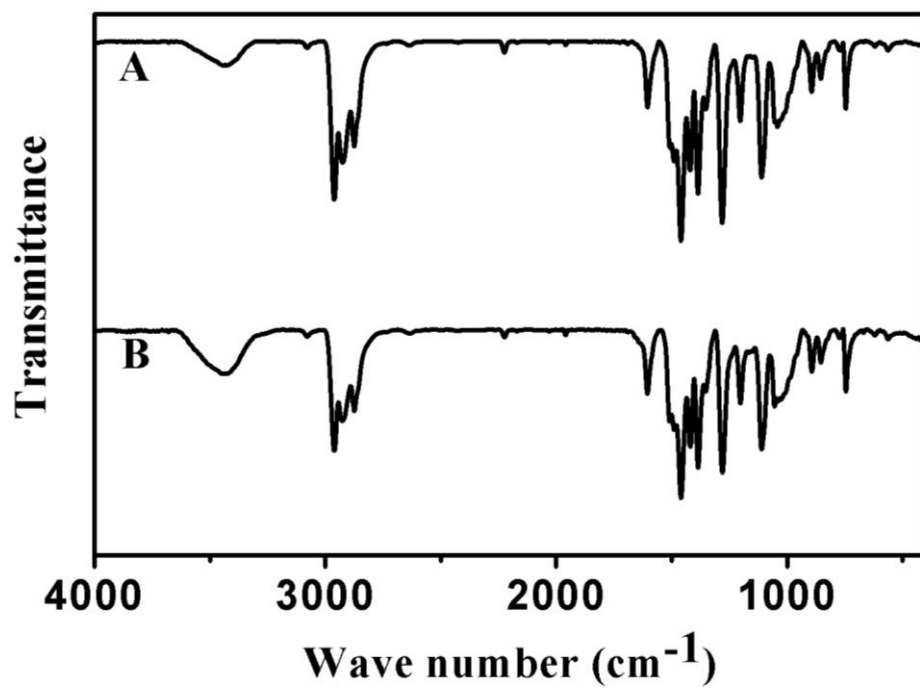

**Figure S10.** IR spectra of phthalocyanine **3** (A) and nanostructures fabricated from **3** (B) in the region of 400-4000 cm<sup>-1</sup> with 2 cm<sup>-1</sup> resolution.

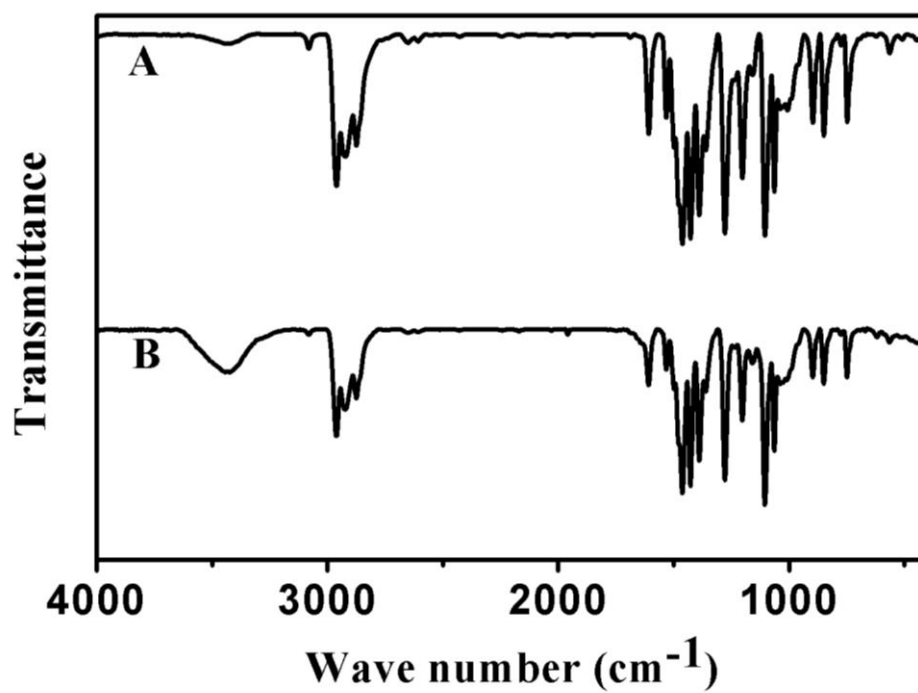

**Figure S11.** IR spectra of phthalocyanine **4** (A) and nanostructures fabricated from **4** (B) in the region of 400-4000 cm<sup>-1</sup> with 2 cm<sup>-1</sup> resolution.

**Table S1.** Analytical and mass spectroscopic data for the phthalocyanine derivatives 1-4. [a]

| Compound                                                                                                | Yield (%) | $M^+$ ( $m/z$ ) <sup>[a,b]</sup> | Analysis (%) <sup>[a]</sup> |             |             |
|---------------------------------------------------------------------------------------------------------|-----------|----------------------------------|-----------------------------|-------------|-------------|
|                                                                                                         |           |                                  | C                           | H           | N           |
| ( <i>S</i> ) - H <sub>2</sub> Pc( $\beta$ - OC <sub>5</sub> H <sub>11</sub> ) <sub>8</sub> ( <b>1</b> ) | 33.9      | 1203.8 (1203.6)                  | 71.90 (71.85)               | 8.17 (8.21) | 9.33 (9.31) |
| ( <i>S</i> ) - ZnPc( $\beta$ - OC <sub>5</sub> H <sub>11</sub> ) <sub>8</sub> ( <b>2</b> )              | 36.6      | 1266.2 (1266.9)                  | 68.26 (68.25)               | 7.59 (7.64) | 8.89 (8.84) |
| ( <i>S</i> ) - CuPc( $\beta$ - OC <sub>5</sub> H <sub>11</sub> ) <sub>8</sub> ( <b>3</b> )              | 39.2      | 1265.3 (1265.1)                  | 68.28 (68.35)               | 7.68 (7.65) | 8.81 (8.86) |
| ( <i>S</i> ) - NiPc( $\beta$ - OC <sub>5</sub> H <sub>11</sub> ) <sub>8</sub> ( <b>4</b> )              | 35.5      | 1259.7 (1260.3)                  | 68.59 (68.62)               | 7.69 (7.68) | 8.83 (8.89) |

[a] Calculated values given in parentheses.

[b] By MALDI-TOF mass spectrometry. The value corresponds to the most abundant isotopic peak of the molecular ion ( $M^+$ ).

**Table S2.** <sup>1</sup>H NMR spectroscopic data (δ) for the compound 1, 2 and 4 recorded in CDCl<sub>3</sub>. [a]

| Compound                                                                                         | Pc-α          | Pc-β                | Pc NH          | Pc alkyl                                                           |                                                                      |                                                                      |                                                                      |
|--------------------------------------------------------------------------------------------------|---------------|---------------------|----------------|--------------------------------------------------------------------|----------------------------------------------------------------------|----------------------------------------------------------------------|----------------------------------------------------------------------|
|                                                                                                  |               |                     |                | OCH <sub>2</sub> CH(CH <sub>3</sub> )C <sub>2</sub> H <sub>5</sub> | OCH <sub>2</sub> CH(CH <sub>3</sub> )CH <sub>2</sub> CH <sub>3</sub> | OCH <sub>2</sub> CH(CH <sub>3</sub> )CH <sub>2</sub> CH <sub>3</sub> | OCH <sub>2</sub> CH(CH <sub>3</sub> )CH <sub>2</sub> CH <sub>3</sub> |
| ( <i>S</i> ) - H <sub>2</sub> Pc(β - OC <sub>3</sub> H <sub>11</sub> ) <sub>8</sub> ( <b>1</b> ) | 8.92 (s, 8 H) | 4.52-4.39 (t, 16 H) | -0.77 (s, 2 H) | 2.23-2.17 (t, 8 H)                                                 | 1.91-1.80 (t, 16 H)                                                  | 1.30-1.22 (br, 24 H)                                                 | 1.17-1.08 (br, 24 H)                                                 |
| ( <i>S</i> ) - ZnPc(β - OC <sub>3</sub> H <sub>11</sub> ) <sub>8</sub> ( <b>2</b> )              | 8.07 (s, 8 H) | 4.31-4.25 (t, 16 H) |                | 2.25 (t, 8 H)                                                      | 1.96 (t, 16 H)                                                       | 1.37-1.36 (br, 24 H)                                                 | 1.23-1.21 (br, 24 H)                                                 |
| ( <i>S</i> ) - NiPc (β - OC <sub>3</sub> H <sub>11</sub> ) <sub>8</sub> ( <b>4</b> )             | 8.54 (s, 8 H) | 4.44-4.32 (t, 16 H) |                | 2.30-2.19 (t, 8 H)                                                 | 1.97-1.83 (t, 16 H)                                                  | 1.49-1.32 (br, 24 H)                                                 | 1.27-1.15 (br, 24 H)                                                 |

[a] Multiplicities: s = singlet, d, = doublet, br=broad, m = multiple

Due to the presence of the unpaired electron and the paramagnetic nature of Cu<sup>2+</sup>, <sup>1</sup>H NMR data for complex **3** is inavailable.

**Table S3.** Electronic absorption data for the compounds **1-4** in chloroform and their nano-aggregates dispersed in methanol.

| Compound                                                                                | in <i>chloroform</i>                 | in <i>methanol</i>      |
|-----------------------------------------------------------------------------------------|--------------------------------------|-------------------------|
| H <sub>2</sub> Pc( $\beta$ -OC <sub>5</sub> H <sub>11</sub> ) <sub>8</sub> ( <b>1</b> ) | 294, 346, 424, 588, 622, 646,<br>681 | 294, 357, 476, 666      |
| ZnPc( $\beta$ -OC <sub>5</sub> H <sub>11</sub> ) <sub>8</sub> ( <b>2</b> )              | 288, 350, 424, 597, 658              | 305, 360, 454, 639      |
| CuPc( $\beta$ -OC <sub>5</sub> H <sub>11</sub> ) <sub>8</sub> ( <b>3</b> )              | 297, 337, 401, 603, 662              | 295, 335, 415, 615, 665 |
| NiPc ( $\beta$ -OC <sub>5</sub> H <sub>11</sub> ) <sub>8</sub> ( <b>4</b> )             | 288, 310, 409, 589, 651              | 272, 328, 428, 605, 673 |
